# Supplementary material for: An empirical study on the evolution and driving factors of energy-related carbon emissions in the Yangtze River Economic Belt
Source: Frontiers journal article supplement (doi:10.3389/fenvs.2025.1596713), 2025-07-24
Supplement: Table_1.xlsx [file Table_1.xlsx]

## Sheet: Sheet1
Region	Year	Permanent Population (10,000 persons)	GDP (100 million yuan)	Total Energy Consumption (10,000 tons)	Coal Consumption (10,000 tons)	Coke Consumption (10,000 tons)	Crude Oil Consumption (10,000 tons)	Gasoline Consumption (10,000 tons)	Kerosene Consumption (10,000 tons)	Diesel Consumption (10,000 tons)	Fuel Oil Consumption (10,000 tons)	Natural Gas Consumption (10,000 tons)	Electricity Consumption (10,000 tons)	Primary Industry Energy Consumption (10,000 tons)	Secondary Industry Energy Consumption (10,000 tons)	Tertiary Industry Energy Consumption (10,000 tons)
上海	2000	1608.63	4812.15	5499.48	4496.08	719.99	1309.7	133.25	55.71	176.44	494.2	2.54	559.45	103.37	3592.87	1069.32
	2001	1668.33	5257.66	5818	4610	709.82	1355.03	137.33	59.57	231.8	492.61	3.3	592.99	113.81	3690.04	1220.67
	2002	1712.97	5795.02	6249	4737	681.24	1424.91	191.73	103.62	262.33	519.71	4.33	645.71	109.09	3798.42	1386.94
	2003	1765.84	6804.04	6796.34	5017.5	627.81	1737.52	202.24	103.44	288.32	616.07	4.97	745.97	111.84	4111	1559.75
	2004	1834.98	8101.55	7405.64	5144.32	590.65	1842.29	221.02	168.15	346.56	657.95	10.69	821.44	108.287	4335.54	1899.22
	2005	1890.26	9197.13	8312.09	5324.52	630.51	1967	242.34	223.32	329.6	765.95	18.72	921.97	61.44	4940.24	2249.12
	2006	1964.11	10598.9	8967.32	5143.09	655.46	1832.84	268.73	261.97	370.98	805.79	25.25	990.15	63.56	5228.78	2411.67
	2007	2063.59	12878.7	9767.75	5259.53	729.7	1719.57	299.66	295.45	417.17	848.61	27.78	1072.38	60.13	5465.23	2832.45
	2008	2140.64	14536.9	10207	5464	714.44	1951.55	340.5	321.47	427.05	788.73	30	1138.22	67.43	5779.65	3166.98
	2009	2210.28	15742.4	10367	5305	677.68	1937.18	388.52	353.11	483.19	742.79	33.52	1153.38	64.15	5961.92	3347.17
	2010	2302.66	17915.4	11201.1	5875.52	717.08	2126.5	415.37	399.07	509.04	744.28	45.01	1295.87	63.49	6154.82	3576.7
	2011	2356	20009.7	11270	6142	714.15	2134.69	472.87	400.5	532.96	675.04	55.43	1340	65.16	6221.16	3594.47
	2012	2399	21305.6	11362.1	5703	673.17	2210.55	517.35	402.74	568.99	640.15	64.38	1353.45	68.68	6065.65	3744.25
	2013	2448	23204.1	11346	5681.19	640.3	2611.76	532.55	437.48	555.84	603.14	72.89	1410.6	73.48	6214.5	3813.55
	2014	2467	25269.8	11084.6	4895.78	654.84	2242.07	577.03	450.72	548.41	556.15	72.43	1369.03	70.4	6227.77	3835.88
	2015	2458	26887	10931	4728.13	630.75	2526.11	467.04	511.45	448.87	539.72	77.41	1406	69.99	6243.33	4012.19
	2016	2467	29887	11242	4625.62	596.95	2474.23	480.82	585.82	446.28	586.96	79.04	1486.02	71.2	6171.32	4291.17
	2017	2466	32925	11382	4577.84	592.31	2492.77	485.18	652.3	441.49	672.44	83.23	1526.77	64.37	5961.32	4552.46
	2018	2475	36011.8	11454	4420.62	621.28	2309.12	494.01	701.64	439.49	658.22	93.49	1566.66	61.78	5672.86	4460.92
	2019	2481	37987.6	11696	4238.28	634.82	2597.22	493.87	753.68	449.3	658.32	99.4	1568.58	59.57	5917.61	4606.53
	2020	2488.22	38963.3	11099.6	4168.01	631.9	2500.41	465.49	500.57	441.7	640.36	94.23	1576	59.3	5658.82	4112.44
	2021	2489.43	43653.2	11683	4003.15	616.35	2282.38	484.99	552.69	463.1	647.02	97.75	1750	62.73	5869.35	4418.31
	2022	2475.89	44652.8	10951	3856.82	618.88	2096.48	396.7	373.19	391.25	608.32	95	1745.55	61.35	5585.03	3974.82
江苏	2000	7327.24	8553.69	8612.43	8769.8	383.69	1376.65	187.3	38.94	345.02	202.44	0.24	971.34	400.39	6785.29	737.84
	2001	7358.52	9456.84	8881	8963	374.61	1317.61	247.71	6.08	355.95	170.64	0.23	1078.44	387.85	6987.36	878.76
	2002	7405.5	10606.9	9609	9663	398.92	1407.68	293.39	6.52	379.28	181.52	1.01	1244.6	365.21	7128.4	993.76
	2003	7457.7	12442.9	11060.1	10848.8	448.06	1714.54	339.17	14.92	413.94	216.31	0.62	1505.13	363.53	8300.06	1114.35
	2004	7522.95	14823.1	13651.7	13272.1	801.07	1875.39	364.23	20.18	508.11	328.2	3.14	1820.08	369.43	11122.8	1325.64
	2005	7588.24	18121.3	16895.4	16778.6	1593.12	2264.76	420.13	21.55	515.12	257.72	13.62	2193.45	321.59	14225	1522.52
	2006	7655.66	21240.8	18742.2	18427.7	1844.49	2302.7	449.51	18.41	587.17	201.06	31.3	2569.75	327.97	15619.4	1633.46
	2007	7723.13	25988.4	20604.4	19951.8	1884.7	2454	481.56	20.79	607.99	236.59	44.58	2952.02	330.16	17535	1828.72
	2008	7762.48	30945.5	22232	20737	1888.95	2313.13	561.8	21.45	646.21	218	63.13	3118.33	330.89	18366.4	2081.43
	2009	7810.27	34471.7	23709	21003	2221.2	2661.44	585.66	21.18	655.87	217.1	63.43	3313.98	360.96	19509.3	2249.04
	2010	7869.34	41383.9	25773.7	23100.5	2663.47	2998.55	749.84	35.69	727.96	157.71	71.57	3864.37	394.68	20879	2617.16
	2011	8023	48839.2	27589	27364	3151.47	2981.07	827.38	44.73	759.4	151.19	93.74	4282	341.63	21628.5	2799.65
	2012	8120	53701.9	28849.8	27762	3170.1	2947.99	935	53.14	803.54	158.35	113.14	4580.91	389.48	22261.2	3073.31
	2013	8192	59349.4	29205	27946.1	3190.61	3394.78	891.46	63.79	752.28	182.7	124.47	4956.62	440.98	22946	3393.44
	2014	8281	64830.5	29863	26912.6	3408.6	3511.4	974.61	82.77	814.06	151.78	127.7	5012.54	462.61	23495.8	3577.29
	2015	8315	71255.9	30374	27209.1	3588.61	3823.2	1003.89	84.85	819.38	143.73	165.02	5115	516.32	23497.3	3759.09
	2016	8381	77350.9	31210	28048.1	3840.21	4092.04	1027.31	90.58	821.31	151.6	172.73	5458.95	535.7	23937.5	3969.56
	2017	8423	85869.8	31602	26620	4070.64	3866.06	1047.25	105.37	862.43	246.02	237.69	5807.89	546.02	23830.1	4252.61
	2018	8446	93207.6	31635	25407.3	4052.63	4067.87	1073.12	113.23	881.47	247.11	276.21	6128.27	564.25	23294.7	4604.36
	2019	8469	98656.8	32526	24902	4953.14	4121.21	1085.87	132.85	887.19	159.03	288.06	6264.36	550.24	23900.9	4880.92
	2020	8477.26	102808	32672.5	24141.7	4485.53	4017.88	1104.53	106.68	900.78	160.37	273.32	6374	542.54	23902.6	4884.8
	2021	8505.4	117392	34679.9	24547.2	4403.65	4020	992.99	115.66	946.18	141.59	295.82	7101	581.4	25257.1	5253.49
	2022	8515	122876	35823.9	24804.3	4460.07	3991.61	976.53	77.47	960.27	139.52	305.34	7399.55	644.05	25794.6	5323.69
浙江	2000	4679.91	6164.79	6560.37	5384.82	117.46	1112.48	196.19	11.25	434.22	182.52	0	738.05	355.269	4306.35	753.536
	2001	4728.8	6927.7	6530	5527	108.64	1123.85	212.87	9.92	471.67	193.19	0	855.29	362.727	4555.43	844.801
	2002	4776.4	8040.66	8280	6595	125.56	1241.04	231.44	9.37	502.15	192.42	0	1015.84	403.811	4983.9	932.79
	2003	4856.8	9753.37	9522.56	7266.69	126.93	1425.16	262.15	10.4	569.98	261.6	0	1240.35	404.296	5283.13	1046
	2004	4925.2	11482.1	10824.7	8361.83	149.21	1853.44	278.66	10.55	641.82	292.31	0.32	1419.53	392.447	6365.2	1162.54
	2005	4990.9	13028.3	12031.7	9680.8	163.59	2113.04	368.53	40.98	803.11	303.66	2.25	1642.31	404.953	7361.6	1301.08
	2006	5071.8	15302.7	13221.5	11334.4	317.76	2114.73	404.8	46.47	842.43	240.95	11.89	1909.23	409.677	7890.68	1479.92
	2007	5154.9	18640	14532.9	13024.1	326.4	2248.73	447.09	49.48	874.4	227.29	18.09	2189.33	421.031	8511.9	1645.92
	2008	5212.4	21284.6	15107	13041	485.98	2287.35	475.36	54.91	898.63	219.86	17.7	2322.87	414.68	8830.55	1765.07
	2009	5275.5	22833.7	15567	13276	504.51	2505.8	508.62	62.9	897.23	289.53	19.3	2471.44	413.429	8866.66	1888.92
	2010	5446.51	27399.8	16865.3	13949.9	443.09	2835.41	586.7	70.42	958.33	330.48	31.81	2820.93	437.247	9362.02	2086.94
	2011	5570	31854.8	17827	14776	470	2939.77	647.76	74.75	958.44	370.29	43.88	3117	447.499	9834.12	2265.2
	2012	5685	34382.4	18076.2	14374	451.42	2732.59	706.16	80.07	938.9	328.67	48.08	3210.55	455.482	10191.2	2376.33
	2013	5784	37334.6	18640	14161.3	446.18	2853.65	706.14	92.15	946.63	328.49	56.72	3453.05	467.776	10316.4	2429.94
	2014	5890	40023.5	18826.4	13824.4	465.07	2731.81	710.38	103.76	932.06	339.38	78.16	3506.39	469.37	10585.8	2518.16
	2015	5985	43507.7	19610	13826.1	427.59	2846.84	754.05	113.52	968.37	326.26	80.35	3554	476.396	10959.3	2689.51
	2016	6072	47254	20276	13948.5	329.47	2667.35	796.92	127.4	881.91	381.29	87.79	3873.19	482.473	10791.7	2801.84
	2017	6170	52403.1	21030	14262	320.17	3038.65	858.97	147.81	831.97	398.32	104.93	4192.63	498.388	10907.2	2901.48
	2018	6273	58002.8	21675	14180.1	323.05	2769.88	862.2	163.65	761.97	304.08	134.91	4532.82	481.511	11082.9	2906.84
	2019	6375	62462	22393	13676.9	302.02	3472.3	789.2	176.37	730.48	303.79	147.2	4706.22	499.412	10689.4	1939.98
	2020	6468.3	64689.1	24660	13131.5	312.48	5082.69	834.57	145.77	703.26	456.38	133.5	4830	477.475	13148.4	2939.85
	2021	6540	74040.8	26623.7	15430	285.53	5636.97	878.65	155.23	698.76	260.63	170.53	5514	465.865	13891.1	3154
	2022	6577	77715.4	29112.3	16145.8	292.63	6753.78	882.69	115.31	686.52	211.44	172.03	5799.31	453.312	15455	3221.33
安徽	2000	6093	3125.33	4878.82	5909.39	533.27	345.06	68.54	2.56	142.12	46.91	0	338.93	163.48	3934.99	268.05
	2001	6128	3502.78	5118	6366	542.67	288.27	70.35	2.7	147.77	47.26	0	359.62	128.23	4410.31	261.01
	2002	6144	3827.66	5316	6679	556.2	307.99	73.9	2.7	155.89	47.52	0	389.94	122.99	4576.76	286.57
	2003	6163	4307.77	5457.09	7488.61	599.66	334.92	76.7	7.53	173.71	53.81	0	445.44	128.64	5128.22	312.19
	2004	6228	5129.12	6016.89	7823.06	544.29	419.79	78.18	8.49	189.48	23.92	0.15	515.94	131.39	5168.59	362.53
	2005	6120.09	5675.85	6518	8339.64	538.39	414.49	86.41	10.52	210.07	23.88	0.85	582.16	149.1	5071.18	493.44
	2006	6110	6500.31	7096.39	8830.52	652.22	445.4	97.8	10.6	239.9	21.62	1.95	662.4	154.22	5616.52	579.94
	2007	6118	7941.61	7752.06	9783.74	809.7	451.08	114.91	11.34	259.16	13.24	4.03	768.7	160.42	6127.05	671.47
	2008	6135	9517.68	8325	11377	851.22	426.34	127.37	11.02	309.63	15.6	7.17	858.87	180.67	6559.56	749.41
	2009	6131	10864.7	8896	12666	856.28	454.13	140.4	13.23	329.14	14.26	9.77	952.3	186.22	6999.36	838.77
	2010	5956.71	13249.8	9706.6	13375.7	910.17	477.57	157.4	8.41	365.75	11.73	12.48	1077.91	198.41	7114.11	1104.35
	2011	5972	16284.9	10570	14538	948.12	484.13	176.16	9.09	416.69	11.31	20.14	1221	209.37	8003.67	1240.61
	2012	5978	18341.7	11358	14704	996.44	421.38	250.64	10.77	578.31	11.08	24.9	1361.1	216.1	8518.65	1439.19
	2013	5988	20584	11696	15665.1	1049.41	551.67	319.33	9.46	626.32	9.8	27.81	1528.07	232.21	8369.62	1652.93
	2014	5997	22519.7	12011	15787	1064.73	749.22	352.68	10.56	663.02	10.25	34.46	1585.18	226.36	8571.32	1781.61
	2015	6011	23831.2	12301	15673.5	1164.77	690.59	456.6	14.08	611.8	13.44	34.83	1640	221.11	8650.12	1885.84
	2016	6033	26307.7	12663	15706.2	1164.64	539.21	509.87	15.98	622.69	21.21	39.18	1794.98	245.65	8709.98	2018.99
	2017	6057	29676.2	13019	16082.2	1048.94	751.59	574.66	15.53	631.56	22.81	44.37	1921.48	250.44	8782.85	2219.53
	2018	6076	34010.9	13295	16673.1	1104.44	728.34	626.42	15.48	653.4	22.14	53.01	2135.07	254.73	8661.67	2370.45
	2019	6092	36845.5	13870	16699.7	1161.43	658.92	655.95	16.59	689.1	21.49	59.64	2300.68	259.48	9022.64	2479.67
	2020	6104.76	38061.5	14697.9	16887	1321	711.03	689.7	11.65	649.37	20.22	66.52	2428	276.89	9819.76	2491.26
	2021	6113	42565.2	15342.6	18897.7	1362.69	752.66	698.65	12.37	722.77	22.65	60.19	2715	308.05	10157.2	2732.93
	2022	6127	45045	15882.7	19911	1276.05	579.56	599.57	7.16	724.25	24.6	78.2	2993.22	334.64	10233.8	2869.19
江西	2000	4149	2003.07	2505	2468.63	205.94	331.18	58.46	2.81	104.78	34.2	0	208.15	151	1759.48	248.02
	2001	4186	2175.68	2329	2584	215.02	299.57	60.37	0.77	130.84	27.28	0	222.29	138.69	1622.96	289.28
	2002	4222	2450.48	2933	2557	261.39	297.27	82.19	0.82	163.87	46.15	0	246.56	134.86	1737.73	374.83
	2003	4254	2812.7	3426	3088.6	297.68	314.07	59.63	5.32	251.6	39.73	0	299.53	149.28	2005.52	476.38
	2004	4284	3398.06	3814	3943.91	379.57	363.41	61.82	8.66	199.49	46.88	0	389.2	144.08	2454.28	458.82
	2005	4311.24	3941.23	4286	4242.9	452.86	368.02	64.49	7.14	302.07	31.08	0.11	391.98	206.89	3105.38	501.24
	2006	4339.13	4696.8	4660.51	4592.26	527.26	417.99	65.99	7.95	313.59	26.5	0.68	453.28	228.35	3402.79	519.18
	2007	4368.41	5777.62	5053.76	5169.99	597.65	396.47	70.61	7.8	295.27	20.95	1.04	516.09	187.448	3783.01	564.603
	2008	4400.1	6934.2	5383	5267	581.4	411	75.68	8.01	288.47	26.98	2.5	546.77	167.31	4049.24	619.96
	2009	4432.16	7629.98	5813	5356	710.41	451.68	77.21	7.65	293.17	22.04	2.58	609.22	156.26	4381.95	673.69
	2010	4462.25	9383.16	6354.88	6246.24	772.61	469.92	155.23	8.5	368.75	23.67	3.85	700.51	139.58	4692.56	792.92
	2011	4474	11584.5	6928	6988	872.32	432.77	182.76	9.05	392.54	1466.6	6.34	835	132.96	5177.59	907.98
	2012	4475	12807.7	7232.92	6802	878.66	508.22	198.42	9.51	416.65	29.85	10.04	867.67	121.16	5417.91	943.21
	2013	4476	14300.2	7583	7254.69	854.93	520.28	236.92	1.7	526.48	31.47	13.43	947.11	126.75	5508.11	1101.03
	2014	4480	15667.8	8055.36	7477.31	871.13	472.24	251.8	2.13	526.52	15.8	15.19	1018.52	129.94	5853.35	1173.52
	2015	4485	16780.9	8423	7658.74	891.7	555.96	284	10.12	537.51	17.59	18.02	1087	131.21	5983.62	1301
	2016	4496	18388.6	8730	7533.19	839.82	725.75	313.63	12.48	546.71	15.05	20.04	1182.5	139.44	6010.39	1423.84
	2017	4511	20210.8	8972	7671.45	862.33	699.38	351.52	15.82	556.6	11.95	21.73	1293.98	143.21	6008.74	1546.34
	2018	4513	22716.5	9286	7877.77	918.13	768	374.5	17.93	588.21	11.74	25.93	1428.77	147.93	5997.36	1753.97
	2019	4516	24667.3	9665	7995.94	939.44	787.96	405.37	19.32	598.82	12.25	26.96	1535.7	152.44	6156.57	1898.54
	2020	4519.45	25782	9808.6	7976.57	961.92	702.48	387.3	14.19	532.68	9.74	26.2	1627	155.01	6252.14	1901.56
	2021	4517.4	29827.8	10517.8	7017.81	942.79	667.23	416.93	17.35	436.67	10.99	35.25	1863	166.91	6699.11	2078.44
	2022	4527.98	32074.7	10785.7	7445.6	954.65	719.55	384.77	10.83	431.06	8.05	39.03	1982.98	166.24	6865.03	2067.53
湖北	2000	5646	3545.39	6269.09	6050.62	556.83	669.77	169.17	18.29	261.3	106.69	0.91	503.02	285.318	4045.92	493.548
	2001	5658	3880.53	6052	6096	521.52	570.06	185.55	14.51	263.88	58.45	0.76	526.03	336.518	4531.43	649.713
	2002	5672	4212.82	6713	6483	536.16	595.43	232.78	17.47	308.28	57	0.91	567.43	366.887	5891.2	722.209
	2003	5685	4757.45	7707.7	7238.46	552.49	637.14	292.86	12.93	370.96	90.77	0.94	629.2	388.838	6284.23	913.335
	2004	5698	5546.78	9120	8053.71	560.36	754.01	304.55	14.55	380.55	87.2	0.94	699.41	421.25	6698.34	1096.71
	2005	5710	6469.66	9850.5	8652.64	685.47	822.13	367.43	26.08	451.49	110.87	6.11	788.91	463	7045	1270
	2006	5693	7531.8	10796.8	9651.64	752.13	851.1	421.49	34.61	496.62	125.99	6.64	894.76	410	7874	1481
	2007	5699	9396.62	11860.6	10534.6	820	910	551.91	35.98	609.42	123.54	8.63	1009.23	422	8764	1769
	2008	5711	11413.9	12845	10196	952.27	884.26	624.23	49.7	613.49	106.97	15.6	1076.24	438	9016	2041
	2009	5720	13082	13708	11100	910.76	946.6	559.5	47.43	790.67	108.88	16.52	1183.04	460	9534	2251
	2010	5727.91	16114.6	15137.6	13470.1	1120.83	1033.86	457.8	40.41	648.96	92.01	19.56	1330.44	436	10582	2572
	2011	5760	19815.6	16579	15805	1172.72	1026.23	497.81	46.75	698.07	97.34	24.92	1573	437	11689	2989
	2012	5781	22479.7	17674.7	15799	1113.85	947.74	566.71	53.26	732.07	104.29	29.28	1642.74	464	12564	3068
	2013	5798	25378	15703	12166.7	1114.39	1176.72	616.05	63.77	805.41	118.84	31.97	1629.75	493	12994	3432
	2014	5816	28242.1	16320.3	11887.8	1124.4	1290.87	660.05	66.04	863.69	135.51	40.24	1656.54	507	10987	2984
	2015	5850	30344	15477	11035.1	1030.01	1299.01	716.92	79.87	817.31	109.27	40.26	1665	485	10832	3145
	2016	5885	33353	15897	10739.8	1095.31	1239.61	743.19	96.97	865.85	117.83	41.5	1763.11	416	9895	3534
	2017	5904	37235	16180	10721.2	1062.32	1428.91	749.17	112	868.27	123.02	52.5	1869	415	9915	3629
	2018	5917	42021.9	16682	11100.1	1131.7	1420.68	784.54	116.26	895.35	129.43	62.7	2071.43	426	9883	3894
	2019	5927	45429	17316	11768.3	1115.52	1516.49	864.59	128.47	976.32	148.83	68.46	2214.3	452	9998	4222
	2020	5744.83	43004.5	16251.5	10371.4	1114.11	2091.04	420.13	13.64	452.51	93.5	61	2144	476	9347	3779
	2021	5829.99	50091.2	18191.6	10623.8	1077.32	1611.75	970.37	80.76	1025.97	125.51	70.64	2472	460	10687	4350
	2022	5844	53734.9	18627	11648.6	1178.61	1466.38	881.56	107.05	1019.54	80.58	67.59	2647.81	510	11446	3675
湖南	2000	6562	3551.49	4070.71	3335.36	299.74	541.05	115.4	8.08	140.18	46.38	0	406.12	310.129	4397.74	536.465
	2001	6595.85	3831.9	4622	4100	320.16	440.43	113.7	4.93	124.1	45.62	1	439.68	365.78	4925.47	706.21
	2002	6629	4151.54	5382	4287	351.13	470.92	134.63	8.74	182.36	43.55	2	476	398.79	5316.52	785.01
	2003	6662.8	4659.95	6297.5	4984.25	395.83	507.82	135.93	8.91	184.89	42.79	3	546.95	422.65	6178.51	884.06
	2004	6698	5542.62	7599.2	6039.79	553.37	615.79	160.47	11.58	242.91	36.81	0.06	662.61	457.88	6519.93	974.69
	2005	6326	6369.87	9110.1	8739.29	756.58	660.86	271.88	12.48	282.05	43.09	1	674.43	476.16	6521.25	1157.88
	2006	6342	7431.55	9879.18	9438.51	823.12	574.49	263.24	20.83	342.08	42.04	4.25	768.78	490.706	7088.4	1240.52
	2007	6355	9285.45	10796.5	10277.4	915.89	671.67	271.67	24.5	395.04	40.2	5.84	890.58	525.001	7740.44	1387.49
	2008	6380	11307.4	12355	10169	998.9	614.11	231.8	25.41	375.51	41.41	8.23	1128.54	626.67	8810.84	1606.61
	2009	6406	12772.8	13331	10751	1011.92	565.77	246.11	30.44	432.38	68.39	10.23	1232.19	678.11	9457.83	1728.59
	2010	6570.08	15574.3	14880.1	11323.3	1089.19	587.6	262.36	30.25	502.98	75.22	11.25	1171.91	844.65	10284.7	1921.54
	2011	6581	18915	16161	13006	851.65	766.03	295.05	32.03	561.72	68.98	15.34	1545	863.41	10998.9	2200.91
	2012	6590	21207.2	16744.1	12084	1072.13	926	388.93	35.22	501.62	61.23	18.79	1582.34	932.52	10978.1	2444.03
	2013	6600	23545.2	14919	11223.8	1075.82	946.54	434.56	38.84	566.32	68.31	20.46	1423.09	966.72	11269	2746.97
	2014	6611	25881.3	15316.8	10899.5	1040.29	801.03	456.8	41.38	599.17	67.73	24.4	1430.88	683.02	9657.77	2899.22
	2015	6615	28538.6	14514	10228.9	1145.05	878.46	514.65	51.76	686.6	92.81	26.53	1448	699.55	9418.38	3154.78
	2016	6625	30853.5	14845	10768.6	960.5	841.6	575.76	55.43	712.98	94.05	26.86	1495.65	715.94	9372.83	3403.08
	2017	6633	33828.1	15200	11018.5	947.57	770.12	642.02	60.75	662.19	93.57	27.07	1581.51	734.57	9449.61	3569.72
	2018	6635	36329.7	15544	10922.3	970.67	949.7	718.92	63.17	649.29	90.44	30.47	1745.24	771.298	10973.5	3783.9
	2019	6640	39894.1	16001	10664	982.53	935.12	819.89	65.03	672.61	83.05	32.9	1864.32	809.863	10651	4210.94
	2020	6645.3	41542.6	16274.6	10199.6	1001.52	1274.87	833.05	87.93	928.79	109.37	34.13	1929	850.357	11101.5	4151.59
	2021	6622	45713.4	16909.3	8291.42	1007.87	809.86	1015.49	103.11	1034.88	105.42	41.16	2155	892.874	10825	4306.69
	2022	6604	48670.4	17027.7	8257.94	1008.45	829.48	1042.57	68.68	1058.36	103.6	45.73	2235.53	937.518	12031.9	4323.09
重庆	2000	2848.82	1822.06	2428	2942.05	180.74		65.66	8.34	61.44	2.68	33.26	307.61	180.03	2421.79	163.81
	2001	2829.21	2014.59	3016	2736	191.05	0.19	64.14	8.33	64.31	4.1	26.56	280.34	181.32	1926.92	168.86
	2002	2814.83	2279.8	2696	3053	189.72	0.25	65.41	8.53	68.91	3.24	27.33	283.51	192.82	2100.97	173.15
	2003	2803.19	2615.57	3069	2646.13	187.73	0.27	65.87	8.58	73.15	2.99	28.75	294.19	190.76	1574.03	173.77
	2004	2793.32	3059.54	3670	2904.38	191.42	0.48	76.37	12.53	169.57	4.32	30.34	309.06	163.93	1558.81	351.27
	2005	2798	3448.35	4359.84	3335.2	388	2.86	77.53	12.3	180.18	3.61	35.5	347.68	206.11	2974.19	514.64
	2006	2808	3900.26	4722.98	3734.6	329.15	3.17	86.22	23.01	186.55	2.66	40.05	405.19	222.89	3140.51	612.87
	2007	2816	4770.72	5216.82	4078.69	323.38	0.13	86.46	27.01	234.11	7.84	43.53	449.21	228.44	3498.59	718.13
	2008	2839	5899.49	6472	5273	342.44	0.02	96.59	30.44	257.65	8.14	48.75	485.92	229.99	3775.72	806.45
	2009	2859	6651.22	7030	5782	334.1	0.01	90.54	34.06	273.55	7.59	49.47	532.34	232.26	4901.63	854.02
	2010	2884.62	8065.26	7855.52	6396.9	299.47	0	102.63	41.78	338.51	8.61	56.42	626.44	262.01	5413.18	1017.68
	2011	2944.43	10161.2	8792	7189	377.79	1	144.97	52.78	397.7	9.37	61.8	717	283.66	6050.9	1083.2
	2012	2974.88	11595.4	9278.41	6750	503.77	2	144.63	54.28	409.91	9.89	70.98	723.03	315.92	6179.3	1331.54
	2013	3011.03	13027.6	8049	5794.47	208.82	3	161.7	58.99	455.95	11.98	72.19	813.26	122.63	4905.83	1459.56
	2014	3043.48	14623.8	8592.73	6095.78	320.43	4	181.64	61.99	425.53	14.75	82.15	867.24	84.38	5713.43	1385.13
	2015	3070.02	16040.5	7747	5047.19	169.91	5	199.98	66.63	491.21	13.9	88.37	875	88.5493	5844.04	1378.46
	2016	3109.96	18023	7982	4854.37	384.31	6	219.05	80.97	514.22	13.91	89.32	924.89	93.8021	5527.66	1695.61
	2017	3143.51	20066.3	8279	5290.31	162.28	7	232.65	83.44	542.31	14.25	95.24	996.55	96.79	5010.94	1673.21
	2018	3163.14	21588.8	8557	5129.52	266.86	8	358.96	94.93	411.42	16.18	99.5	1118.79	104.96	5402.45	1798.14
	2019	3187.84	23605.8	7687.25	5022.94	306.43	9	400.08	102.14	407.02	18.42	103.51	1160.27	110.69	5372.26	1945.76
	2020	3208.91	25041.4	7621.87	4995.54	323.46	10	410.27	86.32	387.07	12.69	103.31	1186	114.05	5633.17	1872.47
	2021	3212.43	28077.3	8046.31	4503.11	341.33	11	416.25	73.99	390.94	13.19	130.22	1341	125.82	5729.23	2067.76
	2022	3213.3	29129	8022.76	4789.38	363.26	12	384.01	63	334.46	11.57	130.23	1404.29	131.28	5999.58	1977.62
四川	2000	8329	3928.2	6517.82	4861.98	447.25	38.89	143.65	36.04	161.61	13.32	58.67	521.23	85.997	2759.8	499.929
	2001	8143	4293.49	6810	4650	487.81	55.8	157.96	43.62	194.86	11.74	63.07	586.48	91.4734	2780.89	556.314
	2002	8110	4725.01	7510	5462	541.2	57.78	171.47	56.13	196.43	12.42	69.96	670.76	133.593	3840.36	815.466
	2003	8176	5346.2	9203.51	7254.1	625.58	75.67	181.66	72.14	226.98	11.13	74.68	758.79	197.633	4611.41	907.786
	2004	8090	6303.96	10700	8188.68	813.32	114.99	204.02	78.99	269.71	8.11	80.64	857.02	223.777	6153.12	1113.95
	2005	8212	7195.88	11301.1	7791.93	894.54	140.81	224.44	93.56	287.43	8.08	89.52	942.59	273	8675	1294
	2006	8169	8494.68	12538.5	8532.71	1003.67	174.94	269.32	105.83	354.61	9.5	106.08	1059.44	313	9798	1333
	2007	8127	10562.1	13685.2	9450.11	1144.05	239.95	330.44	128.62	394.23	7.17	112.15	1177.5	273	10616	1636
	2008	8138	12756.2	15145	10727	1119.1	285.49	375.92	126.61	473.94	12.6	108.94	1213.29	301	11186	1763
	2009	8185	14190.6	16322	12147	1121.99	315.68	462.92	155.07	538.46	13.34	126.99	1361.87	282	12078	2025
	2010	8044.92	17224.8	17891.8	11520.4	1353.64	351.76	541.82	173.31	525.1	62.82	175.26	1549.03	270	13253	2227
	2011	8064	21050.9	19696	11454	1438.85	361.75	642.08	206.24	576.52	70.45	156.08	1963	270	14470	2560
	2012	8085	23922.4	20575	11872	1562.85	351.47	700	205.44	643.4	75.21	153	2009.6	290	14994	2669
	2013	8109	26518	19212	11678.5	1760.13	306.49	818.47	239.76	754.04	87.9	148.3	1948.95	293	14371	2656
	2014	8139	28891.3	19878.7	11045.4	1863.88	865.4	829.84	250.54	748.57	125.72	165.17	2014.79	290	14610	2740
	2015	8196	30342	18306	8824.34	1152.08	989.56	767.06	194.76	842.41	24.91	196.92	1992	299	14179.5	3029.5
	2016	8251	33138.5	18756	8467.99	1129.38	902.77	800.62	210	862.64	69.61	202.69	2101.02	313.5	13983.4	3443.9
	2017	8289	37905.1	19229	7815.38	1127.09	956.37	828.14	205.94	888.45	65.54	216.26	2205.18	338.8	13999.7	3708.3
	2018	8321	42902.1	19916	7495.78	1165.88	719.82	874.13	209.47	902.12	33.33	237	2459.49	360.7	12684	3798.7
	2019	8351	46363.8	20791	7713.47	1302.68	1010.17	916.97	214.2	912.92	50.06	254.38	2635.83	365.9	13267.7	3962.4
	2020	8370.7	48501.6	21185.9	7501.62	1215.66	955.15	955.15	897.18	160.07	898.65	250.59	2865	369.5	13536.6	3909.4
	2021	8372	54088	22569.4	7675.75	1188.62	1024.84	934.8	169.26	925.67	52.36	274.38	3275	394.7	14437	4259.6
	2022	8374	56749.8	22545	7622.39	1117.54	1008.78	985.82	167.49	955.19	25.84	275.9	3447.12	417.4	13927.9	4288
贵州	2000	3755.72	1029.92	4278.61	5146.3	238.86	0	46.46	9.37	57.81	7.51	5.72	287.78	207.11	2473.82	274.68
	2001	3798.51	1133.27	4438	4946	225.34	0	47.83	2.36	82.85	7.46	6	449.05	241.9	2969.4	334.4
	2002	3837.28	1243.43	4470	5199	234.4	0	50.48	2.29	89.23	7.67	5.48	491.67	245.7	2940.3	339.4
	2003	3869.66	1428.97	5534.49	6793.62	239.99	0	58.94	2.55	104.41	9.94	5.45	551.07	274.7	3874.4	402.4
	2004	3903.7	1649.4	6021	7993.74	269.06	0	67.23	2.69	108.4	10.34	4.99	583.26	283.2	4324.7	424
	2005	3730	1939.94	6428.6	8651.44	333.86	0	67.52	8.41	139.04	10.39	5.44	486.97	288.1	4640.7	464.8
	2006	3690	2264.09	7045.34	9938.99	477.05	0	78.94	9.63	169.73	12.01	4.95	619.59	290.8	5317	490.6
	2007	3631.98	2847.46	7691.96	10630.4	486.06	0	85.65	9.73	183.5	34.35	5.14	714.09	141.28	4534.74	747.07
	2008	3595.98	3504.48	7084	9732	450.97	0	123.42	2.95	226.46	23.16	4.74	679.18	146.5	4677.23	868.63
	2009	3537	3856.66	7566	10912	367.79	0	129.99	2.95	234.69	13.47	4.18	750.3	152.95	5021.02	955.84
	2010	3478.94	4518.95	8175.43	10908.1	380.44	0	143.36	8.94	264.66	14.43	4.14	835.38	141.96	5371.99	1051.77
	2011	3530	5615.55	9068	12085	402.88	0	145.23	10.84	304.97	16.04	4.76	944	129.52	5972.01	1152.33
	2012	3587	6742.24	9878.38	13328	382.26	0	158.3	13.27	336.03	4.68	5.26	1046.72	127.17	6516.08	1368.57
	2013	3632	7973.06	9299	13650.7	423.46	0	195.4	21.8	378.7	0.51	8.42	1126.27	136.16	5565.86	1497.4
	2014	3677	9173.13	9708.78	13117.6	375.31	0	217.38	30.1	380.34	0.12	10.62	1173.74	146.86	5668.06	1528.16
	2015	3708	10541	9344	12956.8	310.42	0.02	290.47	31.5	453.96	0.42	13.32	1174	158.33	5498.17	1835.25
	2016	3758	11792.4	9606	13678.9	253.42	0.02	313.65	38.64	440.49	0.52	17.11	1241.78	211.69	5535.31	1889.17
	2017	3803	13605.4	9846	13634.1	214.9	0	380.41	48.57	480.92	0.32	17.73	1384.89	229.5	5351.73	1928.09
	2018	3822	15353.2	10036	12008	209.54	0	437.87	56.68	571.07	0.4	30.82	1482.12	207.51	5155.02	1816.54
	2019	3848	16769.3	10423	12204.2	223.81	0	465.68	59.12	583.44	0.16	36.76	1540.68	214.76	5337.54	1880.26
	2020	3857.86	17860.4	10621.4	11658.9	248.69	0	484.53	49.45	598.02	0.5	39.11	1586	226.92	5384.26	1937.38
	2021	3852	19458.6	11263.8	14372.2	263.43	0	596.6	49.8	728.78	0.81	48.08	1743	243.03	5612.22	2002.27
	2022	3856	20164.6	10980.6	14059.6	269.86	0	605.59	32.34	732.52	0.69	53.93	1743.96	247.40	5189.93	2012.04
云南	2000	4240.8	2030.08	3468.33	3062.04	360	0	90.79	19.24	55.46	11.17	5.17	273.58	297.89	2385.74	290.61
	2001	4287.4	2159	3490	3101	380.36	0.01	111.47	20.55	114.45	8.68	5.29	347.07	271.83	2518.84	404.99
	2002	4333.1	2358.73	4131	3556	590.14	0.02	97.6	18.95	179.35	8.53	5.14	393.46	264.9	2840.5	473.48
	2003	4375.6	2633.39	4449.97	4613.54	759.23	0.05	106.1	20.02	207.45	5.69	5.6	409.79	239.17	3180.7	525.53
	2004	4415.2	3136.38	5209.81	5688.54	1046.32	0.06	111.47	23.5	238.69	7.54	5.76	475.19	216.33	3859.73	616.96
	2005	4450.4	3497.69	6024	6681.53	1223.36	0.07	122.95	28.71	283.9	3.91	6.12	557.25	228.12	4468.59	734.12
	2006	4483	4090.66	6640.58	7482	1252.01	0.07	128.12	35.06	331.66	4.72	5.45	645.62	225.14	4975.84	791.77
	2007	4514	5077.35	7173.26	7620.45	1377.39	0.11	158.11	36.18	382.15	5.04	5.49	745.52	237.9	5395.98	848.27
	2008	4543	6016.59	7511	7916	1331.43	0.06	178.86	38.19	411.95	5.2	5.28	829.44	205.26	5714.25	910.28
	2009	4571	6574.36	8032	8886	1276.33	0.07	193.27	37.24	437.7	5.16	4.52	891.19	215.93	5999.71	971.21
	2010	4601.6	7735.33	8674.17	9349.4	1231.21	0.06	232.49	47.44	562.04	5.62	3.64	1004.07	177.49	6461.17	1214.52
	2011	4620	9523.13	9540	9664	1218.44	0.02	250.34	51.12	609.84	2.59	4.2	1204	194.55	7130.56	1392.31
	2012	4631	11097.4	10433.7	9850	1338.87	0.02	287.51	56.06	650.89	2.61	4.3	1313.62	184.21	7780.95	1558.6
	2013	4641	12825.5	10072	9783.09	1347.57	0.03	280.01	63.73	559.81	3.24	4.27	1459.81	180.25	7426.06	1533.74
	2014	4653	14041.6	10454.8	8674.67	1133.78	0.04	297.74	77.3	569.13	3.82	4.63	1529.38	198.08	7471.46	1718.02
	2015	4663	14960	10425	7756.37	874.33	0.03	368.35	82.39	596.17	2.51	6.34	1439	233.68	7150.41	1862.16
	2016	4677	16369	10726	7481.48	907.09	0.04	391.03	102.96	610.5	1.11	7.71	1410.52	225.18	7324.03	1999.92
	2017	4693	18486	11164	7396.26	952.31	401.96	395.84	113.82	610.83	0.57	9.69	1538.1	225.56	7695.43	2063.15
	2018	4703	20880.6	11590	7402.33	1064.75	1010.03	426.64	122.56	628.65	1.77	13	1679.08	228.77	7903.86	2199.19
	2019	4714	23223.8	12158	7532.73	1120.29	1086.58	467.34	127.65	673.37	0.23	16.47	1812.26	232.89	8274.42	2378.85
	2020	4722.22	24555.7	12981.9	8201.22	1216.96	1027.62	467.21	94.56	672.61	0.01	18.7	2025	239.78	9104.64	2300.41
	2021	4690	27161.6	13426.4	7926.43	1180.27	976.39	520.09	92.76	669.95	0.04	21.14	2139	262.51	9259.24	2496.26
	2022	4693	28954.2	14158.5	7860.79	1121.45	1003.31	499.8	63.81	644.95	0.11	23.93	2389.52	269.05	9998.91	2460.49

## Sheet: Sheet2
		第一产业	第二产业	第三产业
下游	2000	1022.51	18619.5	2828.75
	2001	992.617	19643.1	3205.24
	2002	1001.1	20487.5	3600.06
	2003	1008.31	22822.4	4032.29
	2004	1001.55	26992.2	4749.93
	2005	937.083	31598	5566.16
	2006	955.427	34355.3	6104.99
	2007	971.741	37639.2	6978.56
	2008	993.67	39536.2	7762.89
	2009	1024.76	41337.3	8323.9
	2010	1093.83	43510	9385.15
	2011	1063.66	45687.4	9899.93
	2012	1129.74	47036.8	10633.1
	2013	1214.45	47846.4	11289.9
	2014	1228.74	48880.6	11712.9
	2015	1283.82	49350.1	12346.6
	2016	1335.02	49610.5	13081.6
	2017	1359.22	49481.5	13926.1
	2018	1362.27	48712.2	14342.6
	2019	1368.7	49530.6	13907.1
	2020	1356.21	52529.6	14428.4
	2021	1418.04	55174.8	15558.7
	2022	1493.35	57068.4	15389
中游	2000	746.447	10203.1	1278.03
	2001	840.988	11079.9	1645.2
	2002	900.537	12945.4	1882.05
	2003	960.768	14468.3	2273.78
	2004	1023.21	15672.5	2530.22
	2005	1146.05	16671.6	2929.12
	2006	1129.06	18365.2	3240.7
	2007	1134.45	20287.5	3721.09
	2008	1231.98	21876.1	4267.57
	2009	1294.37	23373.8	4653.28
	2010	1420.23	25559.3	5286.46
	2011	1433.37	27865.5	6097.89
	2012	1517.68	28960	6455.24
	2013	1586.47	29771.1	7280
	2014	1319.96	26498.1	7056.74
	2015	1315.76	26234	7600.78
	2016	1271.38	25278.2	8360.92
	2017	1292.78	25373.3	8745.06
	2018	1345.23	26853.9	9431.87
	2019	1414.3	26805.6	10331.5
	2020	1481.37	26700.7	9832.15
	2021	1519.78	28211.1	10735.1
	2022	1613.76	30342.9	10065.6
下游	2000	771.027	10041.1	1229.03
	2001	786.523	10196	1464.56
	2002	837.013	11722.1	1801.5
	2003	902.263	13240.5	2009.49
	2004	887.237	15896.4	2506.18
	2005	995.33	20758.5	3007.56
	2006	1051.83	23231.3	3228.24
	2007	880.62	24045.3	3949.47
	2008	882.75	25353.2	4348.36
	2009	883.14	28000.4	4806.07
	2010	851.46	30499.3	5510.97
	2011	877.73	33623.5	6187.84
	2012	917.3	35470.3	6927.71
	2013	732.04	32268.8	7146.7
	2014	719.32	33462.9	7371.31
	2015	779.559	32672.1	8105.37
	2016	844.172	32370.4	9028.6
	2017	890.65	32057.8	9372.75
	2018	901.94	31145.3	9612.57
	2019	924.24	32251.9	10167.3
	2020	950.25	33658.7	10019.7
	2021	1026.06	35037.7	10825.9
	2022	1065.13	35116.3	10738.1
		第一产业	第二产业	第三产业
全域	2000	2539.98	38863.8	5335.81
	2001	2620.13	40919	6315.01
	2002	2738.65	45155	7283.61
	2003	2871.34	50531.2	8315.55
	2004	2912	58561.1	9786.34
	2005	3078.46	69028.1	11502.8
	2006	3136.31	75951.9	12573.9
	2007	2986.81	81971.9	14649.1
	2008	3108.4	86765.5	16378.8
	2009	3202.27	92711.4	17783.3
	2010	3365.52	99568.6	20182.6
	2011	3374.76	107176	22185.7
	2012	3564.72	111467	24016
	2013	3532.96	109886	25716.6
	2014	3268.02	108842	26141
	2015	3379.14	108256	28052.8
	2016	3450.58	107259	30471.1
	2017	3542.65	106913	32043.9
	2018	3609.44	106711	33387
	2019	3707.25	108588	34405.9
	2020	3787.82	112889	34280.2
	2021	3963.89	118424	37119.7
	2022	4172.24	122528	36192.8
